# Supplementary material
Source: Royal Society of Chemistry journal article supplement (doi:10.1039/d5ta09611a)
Supplement: d5ta09611a1.pdf [file d5ta09611a1.pdf]

## Supplementary Materials

### **Synergistic defects engineering and cocatalyst loading in Bi<sub>2</sub>MoO<sub>6</sub>-OVs/MoS<sub>2</sub> photoanode for efficient power generation in H<sub>2</sub>O<sub>2</sub> photoelectrochemical cell**

Yutong Liu<sup>1</sup>, Shuohui Li<sup>1</sup>, Bo Yu<sup>2</sup>, Yingying Guan<sup>1</sup>, Xiaosong Han<sup>1</sup>, Yihui Tian<sup>1</sup>, Yang  
Zhao<sup>1,\*</sup>, Huan Wang<sup>1,\*</sup>

<sup>1</sup>College of Chemistry and Chemical Engineering, Northeast Petroleum University,  
Daqing 163318, China

<sup>2</sup>School of Physics and Optoelectronics, South China University of Technology,  
Guangzhou 510640, China

\*Email:

Yang Zhao: [yzhao@nepu.edu.cn](mailto:yzhao@nepu.edu.cn);

Huan Wang: [wanghuan83214@gmail.com](mailto:wanghuan83214@gmail.com)

## **Materials**

Analytical grade compounds including Bismuth nitrate pentahydrate ( $\text{Bi}(\text{NO}_3)_3 \cdot 5\text{H}_2\text{O}$ ), sodium molybdate dihydrate ( $\text{Na}_2\text{MoO}_4 \cdot 2\text{H}_2\text{O}$ ), N, N, N', N'-Tetramethylethylenediamine (TMEDA), ethylene glycol (EG), ethanol, methanol and Ammonium molybdate tetrahydrate ( $(\text{NH}_4)_2\text{MoS}_4$ ) were acquired from Aladdin Industrial Corporation. Deionized water ( $\text{DI H}_2\text{O}$ ) was used during the experiment. All chemicals were analytically pure and did not require further purification.

## **Material Characterization**

Scanning electron microscopy (SEM) and transmission electron microscope (TEM) images were acquired with a Philips XL-30-ESEM-FEG instrument operating at 3 kV and Jem-2100F at an accelerating voltage of 200 kV, respectively. The powder X-ray diffraction (XRD) patterns were obtained on a D/MAX-2200, Japan. Ultraviolet-visible (UV-vis) diffuse reflection spectra (DRS) were measured on a UV-vis spectrophotometer (UV-2550, Shimadzu) with an integrating sphere attachment, and  $\text{BaSO}_4$  was used as the reference material. X-ray photoelectron spectroscopy (XPS) was taken on the Thermo Fisher Scientific K-Alpha.

## **Photoelectrochemical measurements**

Photoelectrochemical performances were examined by CHI 760E electrochemical workstation (CH Instruments, Chenhua, China) under a three-electrode system in 0.5 M  $\text{Na}_2\text{SO}_4$  solution by using saturated Ag/AgCl and Pt foil as the reference electrode and counter electrode, respectively. The working electrodes for electrochemical measurements were prepared by dropping the powder samples onto a pre-cleaned

indium doped tin oxide (ITO) glass. In detail, 10 mg of photocatalyst was dispersed in an ethanol solution (260  $\mu\text{L}$ ) containing 40  $\mu\text{L}$  of Nafion. After dropping the above mixture on ITO followed by drying at 60  $^{\circ}\text{C}$ , the working electrode was obtained. The Mott-Schottky (M-S) curves were measured in the dark at a frequency of 0.5 kHz, respectively. Electrochemical impedance spectra (EIS) were collected at an off-line potential with frequencies ranging from 105 kHz to 0.1 kHz and modulation amplitude of 5.0 mV. The measured potentials (V vs. Ag/AgCl) were converted to the reversible hydrogen electrode (RHE) scale according to the Nernst equation:

$$E = E_{(Ag/AgCl)} + E^{\circ}_{(Ag/AgCl)} + 0.059pH$$

## Characterization of cornstalk-derived porous carbon (PC)

The microstructure and surface morphology of the cornstalk-derived porous carbon (PC) were characterized using SEM. **Fig. S1a** schematically illustrates the hierarchical porous model of PC. The morphology of cornstalk-derived PC exhibited a hierarchical porous layered structure featuring numerous active sites (**Fig. S1b**). XRD patterns of PC revealed two broad diffraction peaks at  $22^\circ$  and  $43^\circ$  [1], assigning to the (002) and (101) planes of amorphous carbon, respectively (**Fig. S1c**).

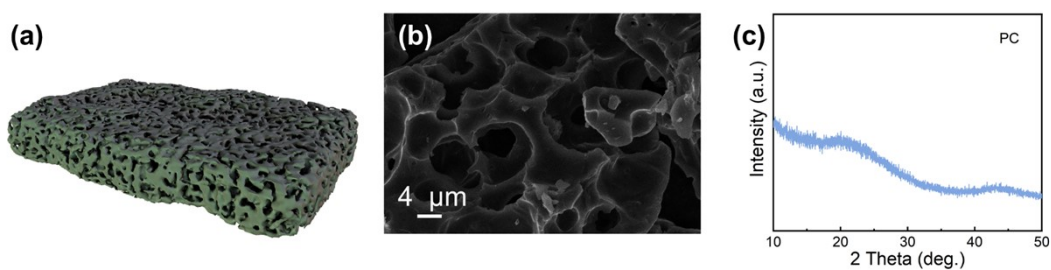

**Fig. S1.** (a) Structural model, (b) SEM image, and (c) XRD patterns of CSPC.

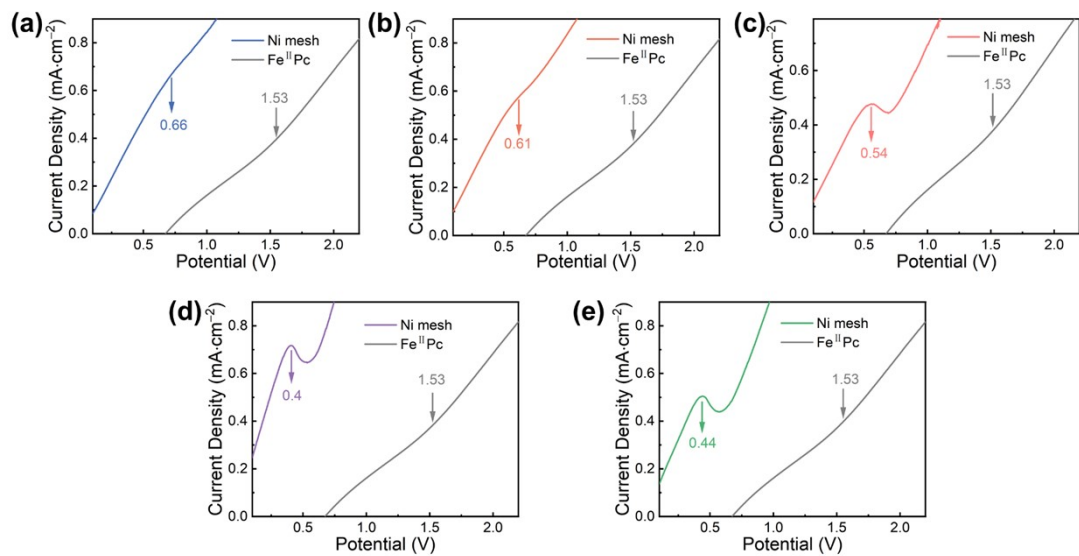

**Fig. S2.** LSV curves of CSPC/ $\text{Fe}^{\text{II}}\text{Pc}$ /ITO cathode and different anodes of BM/Ni mesh (a), BMO/Ni mesh (b), BMOS-1/Ni mesh (c), BMOS-3/Ni mesh (d), and BMOS-5/Ni mesh (e), respectively.

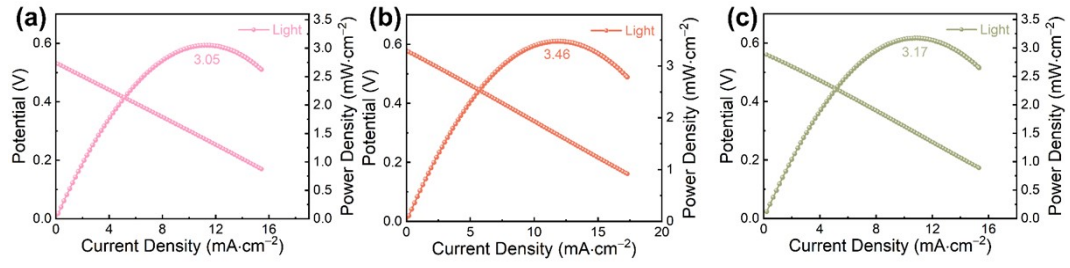

**Fig. S3.** I-V and I-P curves of (a) BMO-0.3-, (b) BMO-, and (c) BMO-0.7-based cells.

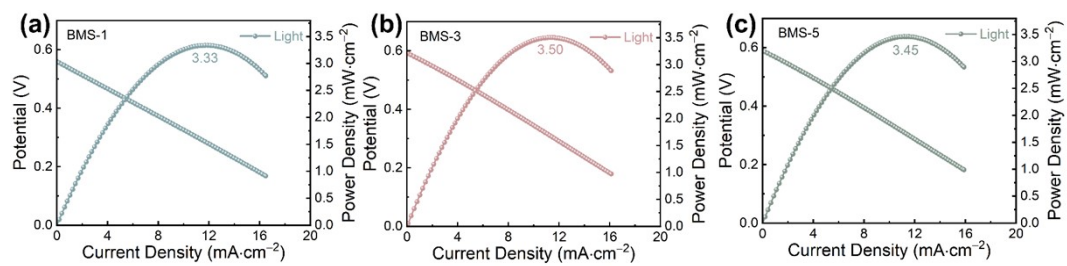

**Fig. S4.** I-V and I-P curves of (a) BMS-1-, (b) BMS-3-, and (c) BMS-5-based cells.

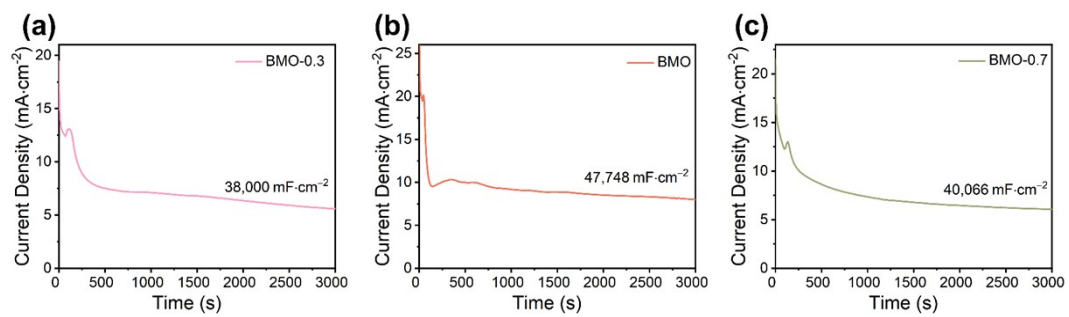

**Fig. S5.** Specific capacitances of (a) BMO-0.3-, (b) BMO-, and (c) BMO-0.7-based cells after 0.5 h of light irradiation.

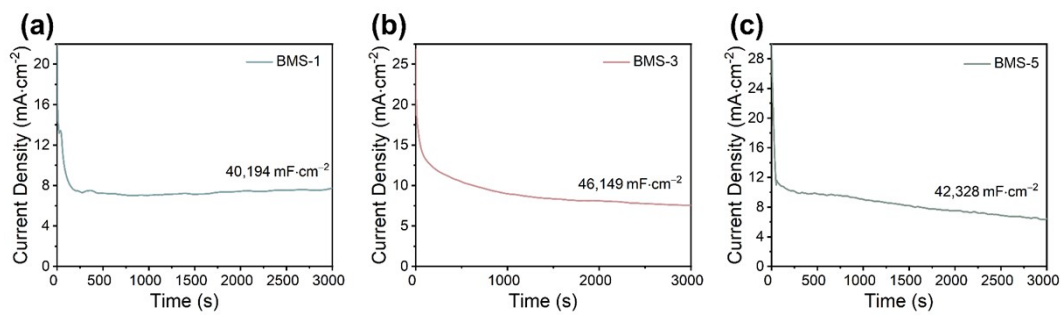

**Fig. S6.** Specific capacitances of (a) BMS-1-, (b) BMS-3-, and (c) BMS-5-based cells after 0.5 h of light irradiation.

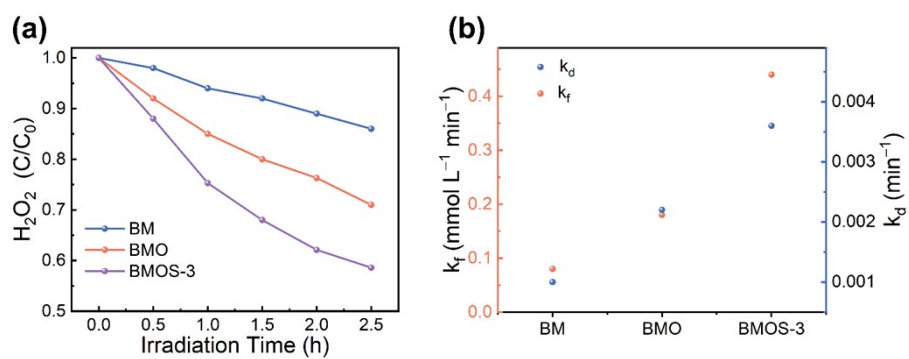

**Fig. S7.** (a) Photocatalytic decomposition of  $\text{H}_2\text{O}_2$  over BM, BMO and BMOS-3; (b) Formation rate constant ( $k_f$ ) and decomposition rate constant ( $k_d$ ) for photocatalytic  $\text{H}_2\text{O}_2$  production over the prepared samples.

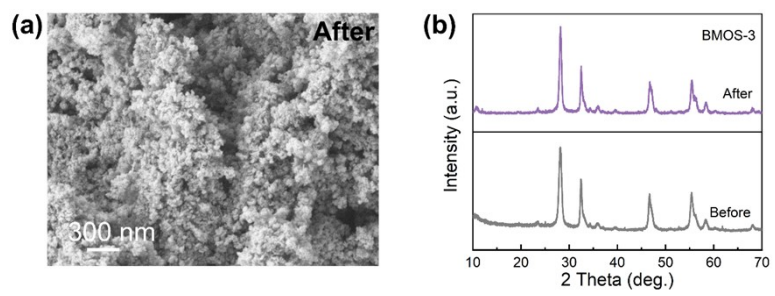

**Fig. S8.** SEM images of BMOS-3 photoanode after test; (b) XRD patterns of BMOS-3 before and after test.

## References

- [1] M. Yang, Z. Nie, R. Wang, Y. Zhao, H. Wang, B, N co-doped porous carbon derived from  $\beta$ -cyclodextrin for high-performance supercapacitors, *J. Energy Storage* 99 (2024) 113271.
